# Supplementary material for: The ubiquitin ligase Cbl-b limits Pseudomonas aeruginosa exotoxin T–mediated virulence
Source: JCI journal article supplement (doi:10.1172/jci28792), 2007-01-18
Supplement: sd1 [file 1]

## Supplemental Methods

Supplementary figure 1. To make the chimeric protein G-ExoT/A+ExoS, the ADPRT domain of ExoS was amplified using primers PB18 (5'-aaagctagcTCGGCCGACAAGGCGCTG -3') and PB25 (5'-aaaaagcttCGAGCTCGGTACCCG -3'). Vector pUCP20 containing ExoT-GAP (R149K) was amplified using primers PB20 (5' -aaagctagcCTCGCCCTTTACCTCGCT -3') and LKG21 (5'-ttggaTCcGGCAAGCCCCAGGAACAG- 3'). The PCR products were digested with *NheI* and *HindIII*, ligated and transformed into *Escherichia coli* strain XL-2 Blue (Invitrogen). The plasmid was introduced into PA103 $\Delta$ exoU $\Delta$ exoT by electroporation (36). The production and secretion of the chimeric protein was confirmed by standard assay protocols (24).

Balachandran et al.  
Supplemental Figure 1

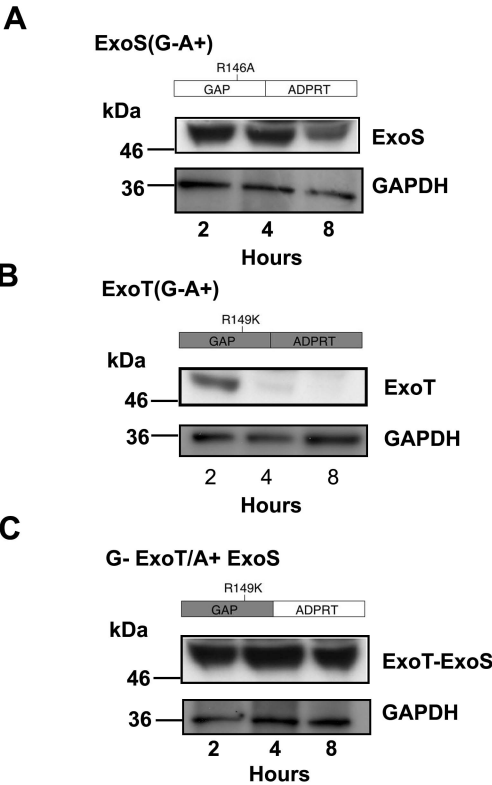

### **Supplemental Figure Legends**

**Supplemental Figure 1. The ADPRT domain of ExoT is necessary and sufficient to alter its stability.** Hela cells were co-cultivated for 1.5 h with (A) PA103 $\Delta$ *exoU* $\Delta$ *exoT* + pUCP20ExoS(G-A+), (B) PA103 $\Delta$ *exoU*/ExoT(G-A+) or (C) PA103 $\Delta$ *exoU* $\Delta$ *exoT*-pUCP20 G-(ExoT)-A+ExoS. Translocation assays were performed as described in Figure 1. Cytoplasmic extracts were prepared at the indicated times and translocated proteins were immunoblotted with anti-ExoT (upper panels). As a control, the blots were also probed with anti-GAPDH antibody (lower panels).

**Supplemental Table 1.** *P. aeruginosa* strains, and plasmids used in this study.

| Strain or Plasmid                                                        | Characteristics                                                                                                                   | References               |
|--------------------------------------------------------------------------|-----------------------------------------------------------------------------------------------------------------------------------|--------------------------|
| PA103 $\Delta$ <i>exoU</i>                                               | PA103 with an in-frame deletion of <i>exoU</i>                                                                                    | (11)                     |
| PA103 $\Delta$ <i>exoU</i> $\Delta$ <i>exoT</i>                          | PA103 with in-frame deletions in <i>exoU</i> and <i>exoT</i>                                                                      | (11)                     |
| PA103 $\Delta$ <i>exoU</i> / <i>exoT</i> (G-A+)                          | PA103 $\Delta$ <i>exoU</i> with a point mutation in ExoT (R149K)                                                                  | (24)                     |
| PA103 $\Delta$ <i>exoU</i> / <i>exoT</i> (G-A-)                          | PA103 $\Delta$ <i>exoU</i> with point mutations in ExoT (R149K and EQE383-385AAA)                                                 | (24)                     |
| PA103 $\Delta$ <i>exoU</i> $\Delta$ <i>exoT</i> -pUCP20 ExoS(G-A+)       | PA103 $\Delta$ <i>exoU</i> $\Delta$ <i>exoT</i> expressing pUCP20-ExoS with a point mutation (R146A)                              | (37)                     |
| PA103 $\Delta$ <i>exoU</i> $\Delta$ <i>exoT</i> -pUCP20 ExoS(G-A-)       | PA103 $\Delta$ <i>exoU</i> $\Delta$ <i>exoT</i> expressing pUCP20-ExoS with point mutations (R146A and E379A/E381A)               | (37)                     |
| PA103 $\Delta$ <i>exoU</i> $\Delta$ <i>exoT</i> -pUCP20 G-(ExoT)A+(ExoS) | PA103 $\Delta$ <i>exoU</i> $\Delta$ <i>exoT</i> expressing pUCP20 containing GAP(R149K) of ExoT fused to the ADPRT domain of ExoS | This study               |
| pIRESKII-EGFP                                                            | pIRESKII-EGFP (Clontech) with bases 1870-1910 removed                                                                             | (24)                     |
| pIRESKII-EGFP/ExoT(G+A+)                                                 | pIRESKII-EGFP with ExoT cloned into the <i>EcoRI</i> site                                                                         | (24)                     |
| pIRESKII-EGFP/ExoT(G-A+)                                                 | pIRESKII-EGFP/ExoT with the R149K mutation                                                                                        | (24)                     |
| pIRESKII-EGFP/ExoT(G+A-)                                                 | pIRESKII-EGFP/ExoT with the EQE383-385AAA mutation                                                                                | (24)                     |
| pIRESKII-EGFP/ExoT(G-A-)                                                 | pIRESKII-EGFP/ExoT with the R149K and EQE383-385AAA mutations                                                                     | (24)                     |
| pCruz-MycB                                                               | Mammalian expression vector containing multiple cloning site 3' to Myc tag                                                        | Santa Cruz Biotechnology |
| pCruz-MycB/ExoT(G-A+)                                                    | pCruz Myc-B carrying ExoT(R149K) cloned in frame to amino-terminal Myc epitope tag                                                | (7)                      |
| pCruz-MycB/ Rev-ExoT(G-A+)                                               | pCruz Myc-B carrying ExoT(R149K) cloned in reverse orientation to amino-terminal Myc epitope tag                                  | (7)                      |
| pcDNA3                                                                   | Mammalian expression vector                                                                                                       | (38)                     |
| pcDNA3-(HA-Ub) <sup>4</sup>                                              | pcDNA3 containing four tandem repeats of Ub-HA cloned into the multiple cloning site                                              | (38)                     |
| pCEFL                                                                    | Mammalian expression vector                                                                                                       | (27)                     |
| pCEFL-Cblb-HA                                                            | pCEFL containing full length Cbl-b with a C-terminal HA tag                                                                       | (27)                     |

|                      |                                                                               |      |
|----------------------|-------------------------------------------------------------------------------|------|
| pCEFL-Cblb(C373A)-HA | pCEFL containing RING finger mutant Cbl-b<br>(C373A) with a C-terminal HA tag | (27) |
| pEBB                 | Mammalian expression vector                                                   | (39) |
| pEBB-CrkII           | pEBB containing full length CrkII                                             | (39) |
